# Supplementary material for: Serial Cultivation of an MSC-Like Cell Line with Enzyme-Free Passaging Using a Microporous Titanium Scaffold
Source: MDPI journal article supplement (doi:10.3390/ma16031165), 2023-01-30
Supplement: s1 [file s1]

Supplementary Materials

# Serial Cultivation of an MSC-Like Cell Line with Enzyme-Free Passaging using a Microporous Titanium Scaffold

Yukihiko Sakisaka <sup>1</sup>, Hiroshi Ishihata <sup>1,\*</sup>, Kentaro Maruyama <sup>1</sup>, Eiji Nemoto <sup>1</sup>, Shigeki Chiba <sup>2</sup>, Masaru Nagamine <sup>2</sup>, Hiroshi Hasegawa <sup>3</sup>, Takeshi Hatsuzawa <sup>4</sup> and Satoru Yamada <sup>1</sup>

<sup>1</sup> Department of Periodontology and Endodontology, Tohoku University Graduate School of Dentistry, 4-1 Seiryō-machi, Aoba-ku, Sendai 980-8575, Japan

<sup>2</sup> Nagamine Manufacturing Co., Ltd., 1725-26, Kishinoue, Manno-cho, Nakatado-gun, Kagawa 766-0026, Japan

<sup>3</sup> Department of Oral Surgery and Dentistry, Fukushima Medical University, 1, Hikariga-oka, Fukushima 960-1295, Japan

<sup>4</sup> Laboratory for Future Interdisciplinary Research of Science and Technology, Institute of Innovative Research, Tokyo Institute of Technology, 4259 Nagatsuta-cho, Midori-ku, Yokohama, Kanagawa 226-8503, Japan

\* Correspondence: hiroshi.ishihata.a8@tohoku.ac.jp; Tel.: +81-22-717-8336 or +81-22-717-8339

**Citation:** Sakisaka, Y.; Ishihata, H.; Maruyama, K.; Nemoto, E.; Chiba, S.; Nagamine, M.; Hasegawa, H.; Hatsuzawa, T.; Yamada, S. Serial Cultivation of an MSC-Like Cell Line with Enzyme-Free Passaging using a Microporous Titanium Scaffold. *Materials* **2023**, *16*, 1165.

<https://doi.org/10.3390/ma16031165>

Academic Editors: Qingquan Liu and Shaohui Xiong

Received: 20 November 2022

Revised: 20 January 2023

Accepted: 26 January 2023

Published: 30 January 2023

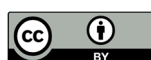

**Copyright:** © 2023 by the authors. Licensee MDPI, Basel, Switzerland. This article is an open access article distributed under the terms and conditions of the Creative Commons Attribution (CC BY) license (<https://creativecommons.org/licenses/by/4.0/>).

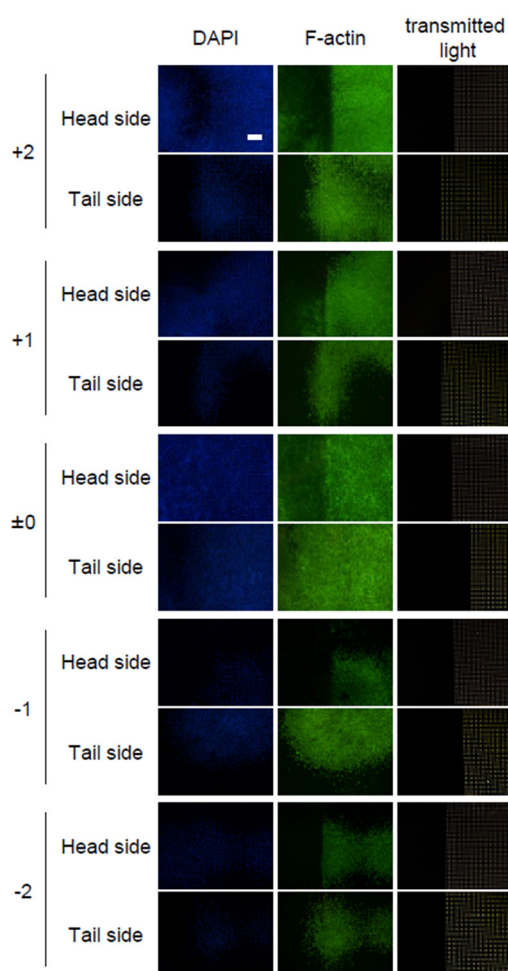

**Figure S1.** The distributions of C3H10T1/2 cells on Ti membranes. The cells were stained for F-actin (green) and nuclei (blue). Compared with the tail side, F-actin expression was lower outside of the microporated area than inside of it on the head side (the scale bars represent 750  $\mu$ m).
